# Supplementary material
Source: publisher figshare collection journal article supplement (https://acs.figshare.com/ndownloader/files/27465418)
Supplement: Supplementary file 1 [file 27465418]

Compounfd No. MOLECULAR Dormula Strings		BIOLOGICAL Activity (Tumor Cell Specificity/retention)
1	CC(C(/C=C(C(C(C)OC(C)CCCC)=C/1C)\NC1=C/C(C(C)[C@@H]/2CCC(OC)=O)=NC2=C3\CC4=O)=N/5)=C(CC)C5=C\C6=C(C)C4=C3N6	HN-T1 cancer cells
2	CC(C(/C=C(C(C(C)OC(C)CCCC)=C/1C)\NC1=C/C(C(C)[C@@H]/2CCC(O)=O)=NC2=C3\CC4=O)=N/5)=C(CC)C5=C\C6=C(C)C4=C3N6	HN-T1 and HN-143 cancer cells
3	CC(C(/C=C(C(COC(C)CCCC)=C/1C)\NC1=C/C(C(C)[C@@H]/2CCC(OC)=O)=NC2=C3\CC4=O)=N/5)=C(CC)C5=C\C6=C(C)C4=C3N6	HN-T1 cancer cells
4	CC(C(/C=C(C(COC(C)CCCC)=C/1C)\NC1=C/C(C(C)[C@@H]/2CCC(O)=O)=NC2=C3\CC4=O)=N/5)=C(CC)C5=C\C6=C(C)C4=C3N6	HN-143 cancer cells Tumor-binding (in vivo) TEC-21 lung cells
5	CC(C(/C=C(C(COCCCCCC)=C/1C)\NC1=C/C(C(C)[C@@H]/2CCC(OC)=O)=NC2=C3\CC4=O)=N/5)=C(CC)C5=C\C6=C(C)C4=C3N6	HN-T1 cancer cells
6	CC(C(/C=C(C(COCCCCCC)=C/1C)\NC1=C/C(C(C)[C@@H]/2CCC(O)=O)=NC2=C3\CC4=O)=N/5)=C(CC)C5=C\C6=C(C)C4=C3N6	H-NT1 and HN-143 cancer cells
7	CC(C(/C=C(C(C(OCCCC)CCC)=C/1C)\NC1=C/C(C(C)[C@@H]/2CCC(OC)=O)=NC2=C3\CC4=O)=N/5)=C(CC)C5=C\C6=C(C)C4=C3N6	HN-T1 and HN-143 cancer cells
8	CC(C(/C=C(C(C(OCCCC)CCC)=C/1C)\NC1=C/C(C(C)[C@@H]/2CCC(O)=O)=NC2=C3\CC4=O)=N/5)=C(CC)C5=C\C6=C(C)C4=C3N6	HN-143 cancer cells Tumor-binding (in vivo) TEC-21 lung cells
9	CC(C(/C=C(C(C(OCCCCCC)CCC)=C/1C)\NC1=C/C(C(C)[C@@H]/2CCC(OC)=O)=NC2=C3\CC4=O)=N/5)=C(CC)C5=C\C6=C(C)C4=C3N6	HN-T1 and HN-143 cancer cells
10	CC(C(/C=C(C(C(OCCCCCC)CCC)=C/1C)\NC1=C/C(C(C)[C@@H]/2CCC(O)=O)=NC2=C3\CC4=O)=N/5)=C(CC)C5=C\C6=C(C)C4=C3N6	HN-143 cancer cells
11	CC(C(/C=C(C(CCCC)=C/1C)\NC1=C/C(C(C)[C@@H]/2CCC(OC)=O)=NC2=C3\CC4=O)=N/5)=C(CC)C5=C\C6=C(C)C4=C3N6
12	CC(C(/C=C(C(CCCC)=C/1C)\NC1=C/C(C(C)[C@@H]/2CCC(O)=O)=NC2=C3\CC4=O)=N/5)=C(CC)C5=C\C6=C(C)C4=C3N6
13	CC(C(/C=C(C(CCCCCCCC)=C/1C)\NC1=C/C(C(C)[C@@H]/2CCC(OC)=O)=NC2=C3\CC4=O)=N/5)=C(CC)C5=C\C6=C(C)C4=C3N6
14	CC(C(/C=C(C(CCCCCCCC)=C/1C)\NC1=C/C(C(C)[C@@H]/2CCC(O)=O)=NC2=C3\CC4=O)=N/5)=C(CC)C5=C\C6=C(C)C4=C3N6	HN-T1 and HN143 cancer cells
15	CC(C(/C=C(C(C(C)SCCCCCC)=C/1C)\NC1=C/C(C(C)[C@@H]/2CCC(OC)=O)=NC2=C3\CC4=O)=N/5)=C(CC)C5=C\C6=C(C)C4=C3N6	HN-T1 and HN-143 cabcer cells
16	CC(C(/C=C(C(C(C)SCCCCCC)=C/1C)\NC1=C/C(C(C)[C@@H]/2CCC(O)=O)=NC2=C3\CC4=O)=N/5)=C(CC)C5=C\C6=C(C)C4=C3N6	HN- T1 and HN-143 cabcer cells
HPPH	Known Compound	HN-T1 and HN-143 cancer cells Tumor binding (in vivo) TEC-21 lung cells
